# Supplementary material for: Nutritional treatment of children 6–59 months with severely low weight-for-age z-score: a study protocol for a 3-arm randomized controlled trial
Source: Springer Nature journal article supplement (doi:10.1186/s13063-023-07890-0), 2024-01-08
Supplement: MOESM1 [file 26606664]

**CONSENT FORM FOR WAZ-STUDY**

Staff explained the study to me in a language I understand. I had time to think about this information. I was able to ask questions.  
All of my questions have been answered.

|                          |                          |
|--------------------------|--------------------------|
| <b>YES</b>               | <b>NO</b>                |
| <input type="checkbox"/> | <input type="checkbox"/> |

I understand that it is my choice to join this study or not. I understand that I can stop participating in this study at any time, for any reason.  
If I stop participating, nothing bad will happen. My child will still receive health services. I do not give up any legal rights by participating in this study.

|                          |                          |
|--------------------------|--------------------------|
| <input type="checkbox"/> | <input type="checkbox"/> |
|--------------------------|--------------------------|

I understand that any personal information about me or my child, such as his/her name or address, will be kept private. Information that does not identify my child, such as the child’s weight or height, may be used in other research studies.  
Information that cannot be linked to me or my child may be shared publicly.

|                          |                          |
|--------------------------|--------------------------|
| <input type="checkbox"/> | <input type="checkbox"/> |
|--------------------------|--------------------------|

**I am responsible for \_\_\_\_\_.**  
**I accept that he/she will participate in this study.**

|                          |                          |
|--------------------------|--------------------------|
| <input type="checkbox"/> | <input type="checkbox"/> |
|--------------------------|--------------------------|

**I accept participating in this study.**

|                          |                          |
|--------------------------|--------------------------|
| <input type="checkbox"/> | <input type="checkbox"/> |
|--------------------------|--------------------------|

I accept you conduct the skinfold measure and the bioelectrical impedance analysis on my child

|                          |                          |
|--------------------------|--------------------------|
| <input type="checkbox"/> | <input type="checkbox"/> |
|--------------------------|--------------------------|

I accept you take a drop of blood from my child’s finger

|                          |                          |
|--------------------------|--------------------------|
| <input type="checkbox"/> | <input type="checkbox"/> |
|--------------------------|--------------------------|

**NAME AND SIGNATURE OF THE PARTICIPANT**

|                                 |            |                            |
|---------------------------------|------------|----------------------------|
| (Name of the child)             | (Study ID) |                            |
| (Name of the caregiver)         | (Date)     | (Signature or fingerprint) |
| (Name of the impartial witness) | (Date)     | (Signature or fingerprint) |

**NAME AND SIGNATURE OF THE RESEARCH STAFF**

|                         |        |             |
|-------------------------|--------|-------------|
| (Name of the IRC staff) | (Date) | (Signature) |
|-------------------------|--------|-------------|
